# Supplementary material for: Nanoconfined carbonization enabling high-density porous carbon for jointly superior gravimetric and volumetric zinc-ion storage
Source: Royal Society of Chemistry journal article supplement (doi:10.1039/d4ee02163k), 2024-01-01
Supplement: d4ee02163k1.pdf [file d4ee02163k1.pdf]

## Supplementary Information

### **Nanoconfined Carbonization Enabling High-Density Porous Carbon for Jointly Superior Gravimetric and Volumetric Zinc-Ion Storage**

Jiacong Lu<sup>a</sup>, Xinyue Zhong<sup>a</sup>, Xiaomin Lin<sup>a</sup>, Jiuqing Gui<sup>a</sup>, Mingtao Zheng<sup>ab</sup>, Yingliang Liu<sup>a</sup>, Yeru Liang<sup>\*ab</sup>

*<sup>a</sup>Key Laboratory for Biobased Materials and Energy of Ministry of Education, College of Materials and Energy, South China Agricultural University, Guangzhou 510642, P. R. China*

*<sup>b</sup>Maoming Branch, Guangdong Laboratory of Lingnan Modern Agriculture, Maoming 525000, P. R. China*

## **Experimental Section**

### **Materials**

Glucose was purchased from Shanghai RichJoint Chemical Reagents Co., Ltd.. Urea and  $\text{ZnSO}_4 \cdot 7\text{H}_2\text{O}$  were purchased from Shanghai Aladdin Biochemical Technology Co., Ltd.. Tetraethyl orthosilicate (TEOS) was purchased from Tianjin Luck Early morning Chemistry Reagent plant. 98wt%  $\text{H}_2\text{SO}_4$  and 40wt% Hydrofluoric acid were purchased from Guangzhou Chemical Reagent Co., Ltd.. All chemicals were analytical grade and used as received.

### **Preparation of LCC**

0.9 g of glucose and 0.6 g of urea were dissolved in 1.5 mL of pH 2.0  $\text{H}_2\text{SO}_4$  aqueous solution under stirring until clear. The resulting mixture was placed in an open flask at 40 °C for 2 days, followed by vacuum drying at 60 °C for 1 day, and subsequent drying at 100 °C and 160 °C for 6 h each. The sample was then carbonized up to 700 °C with a heating rate of 5 °C  $\text{min}^{-1}$  in  $\text{N}_2$  flow for 2 h. After carbonization, the resulting sample was filtered, dried, and denoted as LCC.

### **Preparation of HDPCs**

0.9 g of glucose and 0.6 g of urea were dissolved in 1.5 mL of pH 2.0  $\text{H}_2\text{SO}_4$  aqueous solution under stirring until clear. Subsequently, x mL of tetraethyl orthosilicate (TEOS) was added with continuous stirring until homogenization. The resulting mixture was aged in an open flask at 40 °C for 2 days, followed by vacuum drying at 60 °C for 1 day, and subsequent drying at 100 °C and 160 °C for 6 h each. The samples were then carbonized up to 700 °C with a heating rate of 5 °C  $\text{min}^{-1}$  in  $\text{N}_2$  flow for 2 h. After carbonization, the black carbon/silica nanocomposite underwent washing with 40 wt% hydrofluoric acid to remove the silica, followed by filtration, drying, and denoted as HDPC-x.

### **Preparation of LCC, HDPCs and YP-50F electrodes**

LCC, HDPCs, and YP-50F electrodes were prepared by mixing LCC, HDPC-x, and YP-50F, respectively, with acetylene black and poly(vinylidene fluoride) binder at a

weight ratio of 8:1:1 in 1-methyl-2-pyrrolidinone. The slurry was pasted on carbon paper and dried overnight at 80 °C. The electrodes have a diameter of 12 mm, corresponding to an approximate area of 113 mm<sup>2</sup>. Typically, the mass loadings of all cathodes are maintained at 1-1.5 mg cm<sup>-2</sup>. To assess the electrochemical performance of the samples under higher mass loadings, the cathode mass loadings were varied from 4.2 mg cm<sup>-2</sup> to 12.5 mg cm<sup>-2</sup>.

### **Materials Characterization**

The microstructures of prepared samples were characterized using high-resolution transmission electron microscopy (Talos F200S, FEI) and scanning electron microscopy (SU8220, Hitachi). Thermogravimetric analysis was performed using a thermal gravimetric analyzer (TG209F1LibraTM, NETZSCH) from room temperature to 700 °C at a rate of 5 °C min<sup>-1</sup> in N<sub>2</sub>, and from room temperature to 900 °C at a rate of 10 °C min<sup>-1</sup> in air. X-ray powder diffraction patterns were obtained with an X-ray diffraction meter (Ultima IV, Rigaku) using Cu/K- $\alpha$  radiation at a scanning rate of 10°min<sup>-1</sup> from 10° to 80° ( $\lambda = 0.15418$  nm). Density was assessed using a Tap Density Tester (FT-100A, Rlco) with a vibration frequency of 180 times per minute. Pore structure parameters were determined using an ASAP 3Flex automatic volumetric sorption analyzer at 77 K (Micromeritics Sorption Analyzer). Specific surface area ( $S_{\text{BET}}$ ) was analyzed by Brunauer-Emmett-Teller theory, and micropore surface area ( $S_{\text{micro}}$ ) was determined using the t-plot method. The pore size distribution was analyzed by original density functional theory (DFT) combined with non-negative regularization and medium smoothing.

### **Electrochemical Measurements**

The aqueous zinc-ion hybrid supercapacitors (ZHSCs) were assembled in 2025 coin-type cell with the as-prepared carbon electrode as cathode, Zn foil as anode and 2M ZnSO<sub>4</sub> as electrolyte. Galvanostatic charge-discharge tests were conducted using a Neware battery cycler (CT4008-5V10mA-164) over a voltage range of 0-1.8 V at various current densities. Electrochemical impedance spectroscopy was performed on a Modulab XM DSSC with an amplitude of 5 mV over a frequency range from 100

kHz to 10 mHz. Cyclic voltammetry tests were conducted using a CHI660E electrochemical workstation, with voltage scanning from 0 to 1.8 V at scanning rates of 5, 10, 20, 50, and 100 mV s<sup>-1</sup>. Ex-situ X-ray diffraction analysis of electrodes commenced with assembly into zinc-ion hybrid supercapacitor coin cells, followed by constant current charge-discharge cycling to a predetermined voltage. Subsequently, the cell was disassembled, and the electrode was meticulously cleaned, and dried for one day. The prepared electrodes were then subjected to X-ray diffraction analysis using an Ultima IV diffractometer (Rigaku) with Cu/K- $\alpha$  radiation at a scanning rate of 10° min<sup>-1</sup> over a range of 10° to 80° ( $\lambda = 0.15418$  nm). Gravimetric capacitance ( $C_g$ , F g<sup>-1</sup>) and volumetric capacitance ( $C_v$ , F cm<sup>-3</sup>) of carbon cathode were calculated from galvanostatic charge-discharge curves using Equations (1) and (2), respectively:<sup>1</sup>

$$C_g = \frac{I \Delta t}{m \Delta U} \quad (1)$$

$$C_v = C_g \times \rho \quad (2)$$

where  $I$  is the current density,  $\Delta t$  is the discharging time,  $m$  is the mass loading,  $\Delta U$  is the discharge voltage, and  $\rho$  is the density. Gravimetric energy density ( $E_g$ , Wh kg<sup>-1</sup>) and volumetric energy density ( $E_v$ , Wh L<sup>-1</sup>) were calculated by Equations (3) and (4), respectively:<sup>1</sup>

$$E_g = \frac{C_g (\Delta U)^2}{2 \times 3.6} \quad (3)$$

$$E_v = E_g \times \rho \quad (4)$$

The corresponding gravimetric ( $P_g$ , W kg<sup>-1</sup>) and volumetric power density ( $P_v$ , W L<sup>-1</sup>) were obtained from Equations (5) and (6), respectively:<sup>1</sup>

$$P_g = \frac{3600 \times E_g}{\Delta t} \quad (5)$$

$$P_v = P_g \times \rho \quad (6)$$

Capacitance per surface area ( $C_s$ , F m<sup>-2</sup>) of carbon cathode were calculated using Equations (7):<sup>2</sup>

$$C_s = \frac{C_g}{S} \quad (7)$$

where S is the SSA. Notably,  $C_{s,>x \text{ nm}}$  and  $C_{s,y-z \text{ nm}}$  represent  $C_s$  of pores with diameters exceeding x nm and ranging from y nm to z nm, respectively.

Relative standard deviation (RSD) were calculated by Equations (8):

$$\text{RSD} = \frac{s}{\bar{x}} \times 100\% = \frac{\sqrt{\frac{\sum_{i=1}^n (x_i - \bar{x})^2}{n-1}}}{\bar{x}} \times 100\% \quad (8)$$

where s is the standard deviation and  $\bar{x}$  is the average.

## Supplementary Figures

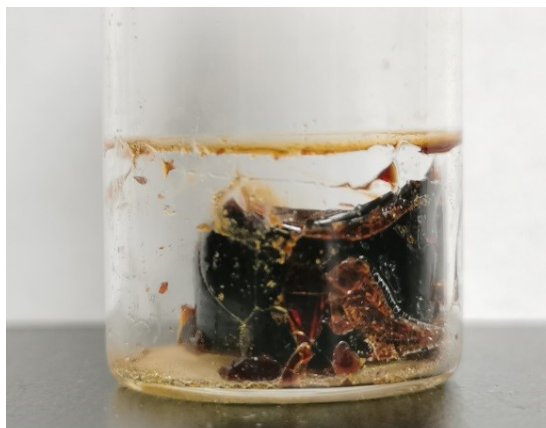

**Fig. S1** Digital photo of carbon/silica composite.

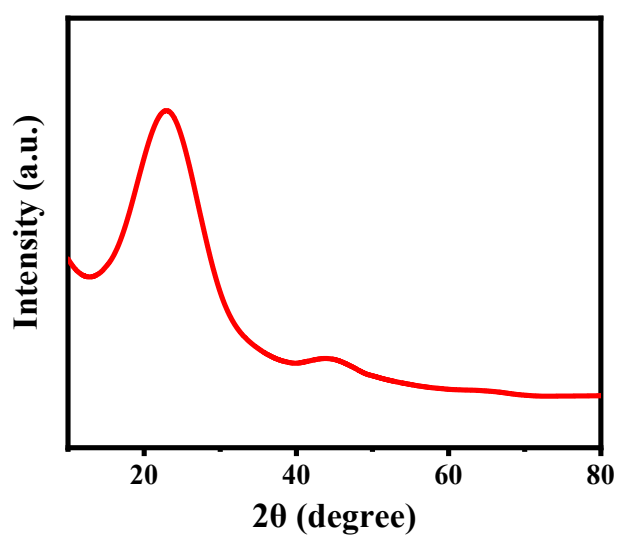

**Fig. S2** XRD pattern of the carbon/silica composite for preparing HDPC-1.

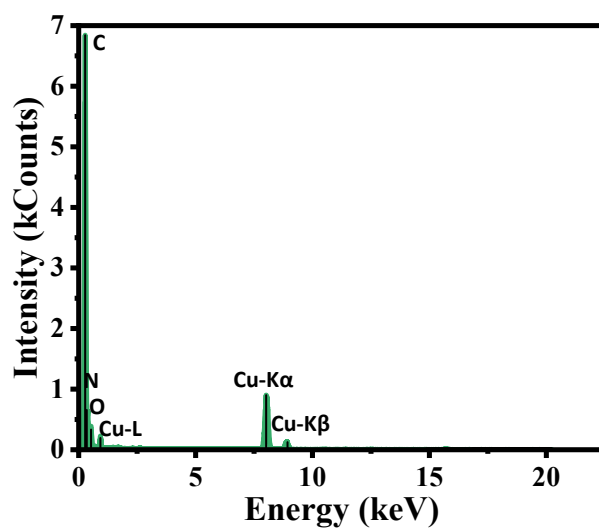

**Fig. S3** Energy dispersive X-ray spectroscopic analyses from TEM observation for HDPC-1.

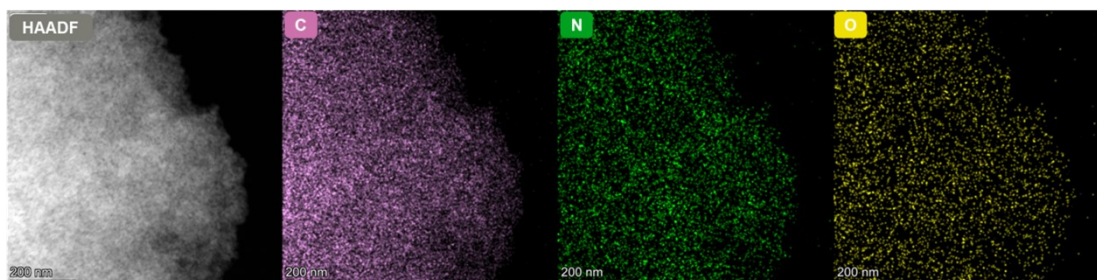

**Fig. S4** Electron energy loss spectroscopy mapping images of HDPC-1.

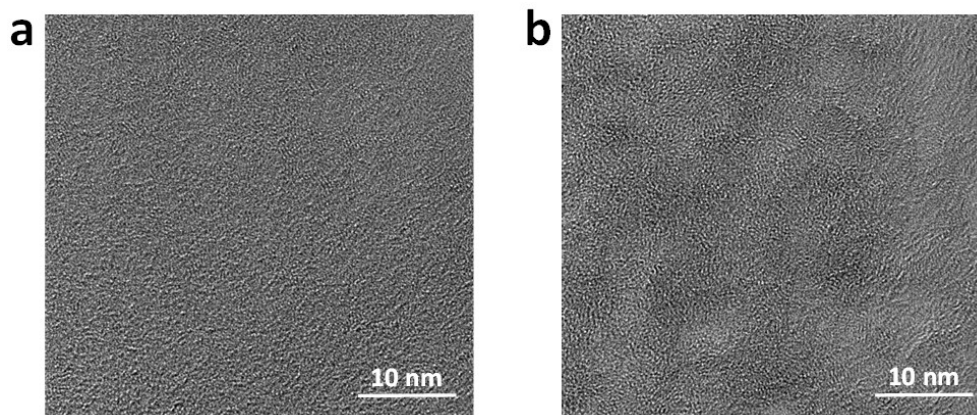

**Fig. S5** High-resolution TEM images of (a) LCC and (b) HDPC-1.

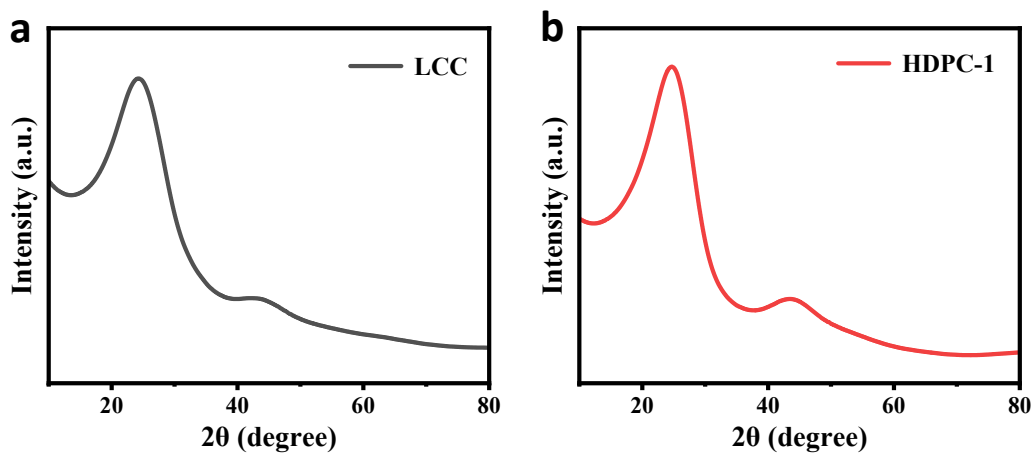

**Fig. S6** XRD patterns of (a) LCC and (b) HDPC-1.

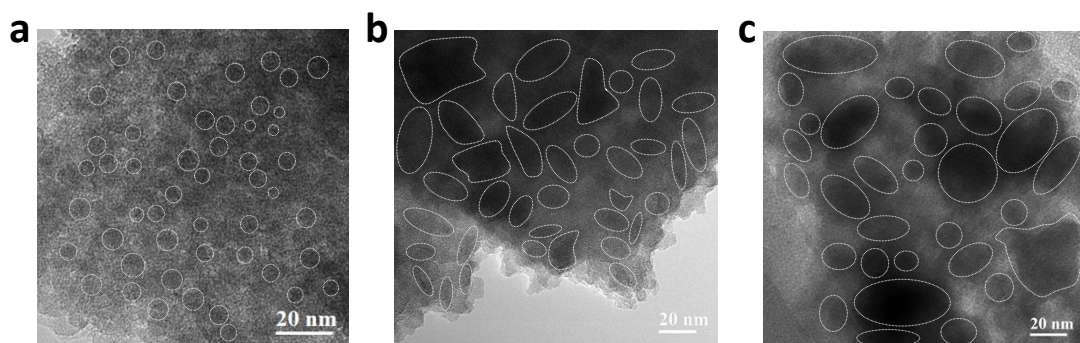

**Fig. S7** TEM images of the carbon/silica composites for preparing (a) HDPC-1, (b) HDPC-2 and (c) HDPC-3. Dashed circles indicate the silica components within the composites.



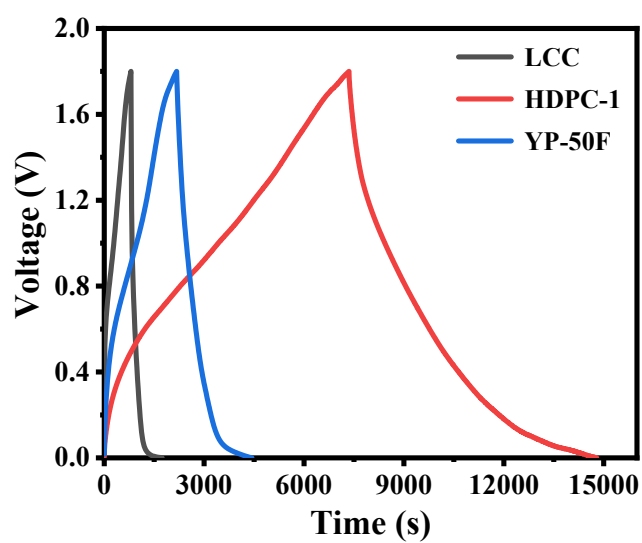

**Fig. S8** Galvanostatic charge-discharge curves of LCC, HDPC-1 and YP-50F at a current density of  $0.1 \text{ A g}^{-1}$ .

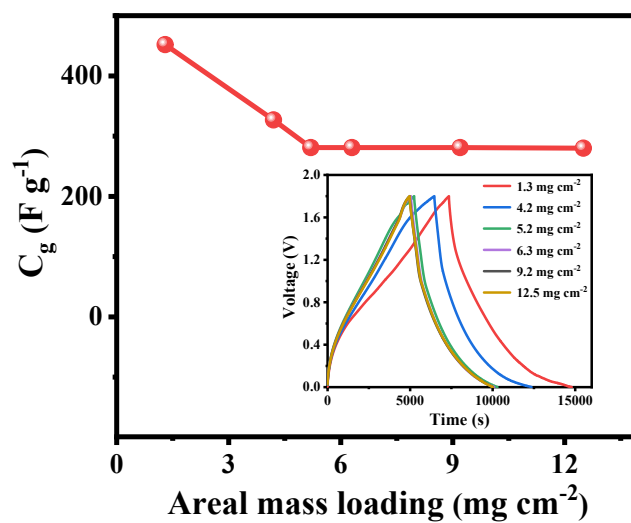

**Fig. S9**  $C_g$  of HDPC-1 under various areal mass loadings.

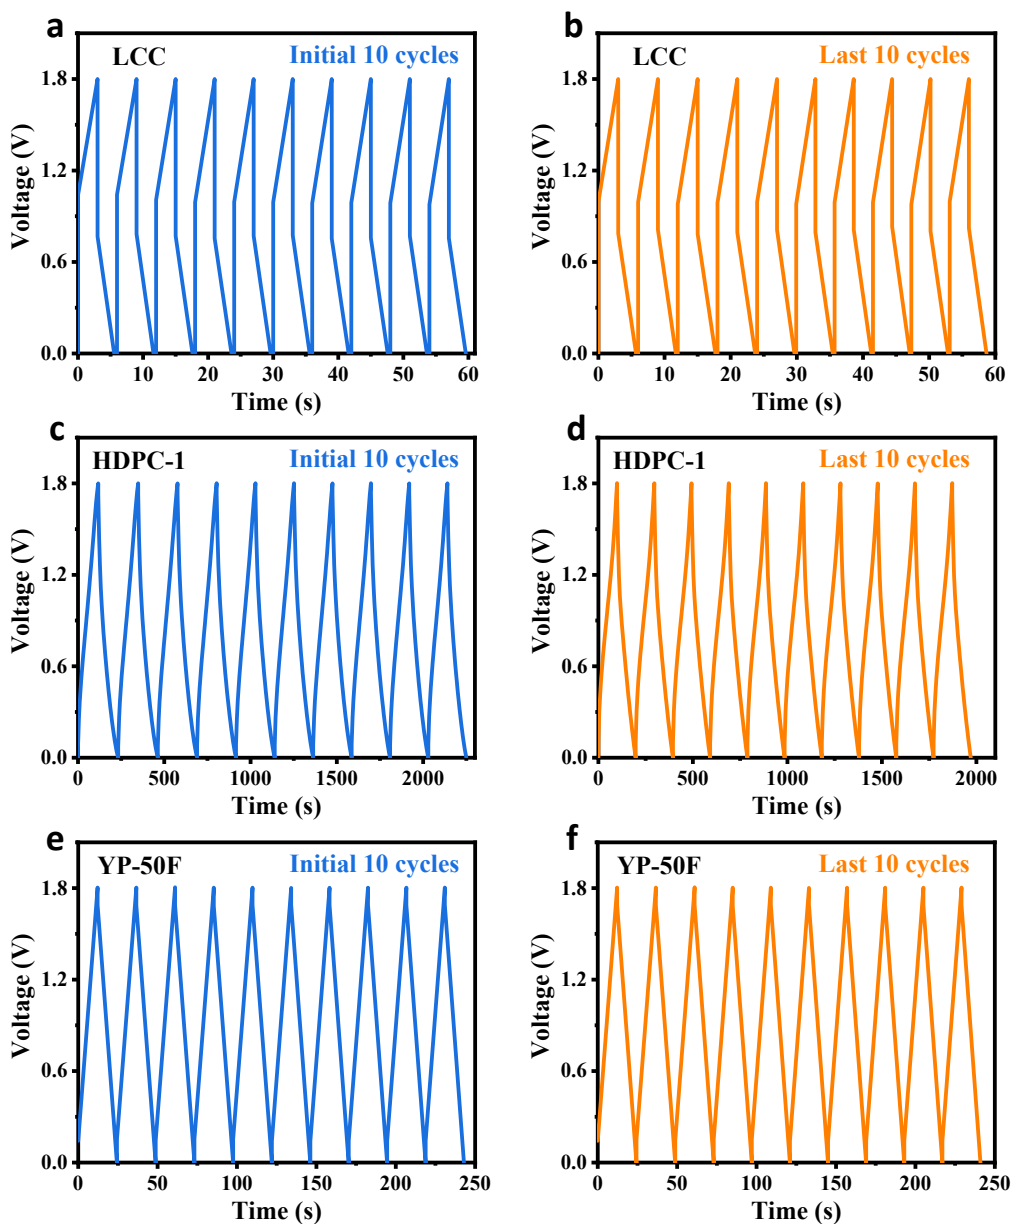

**Fig. S10** Galvanostatic charge-discharge curves for the initial ten cycles and last ten cycles of the (a, b) LCC, (c, d) HDPC-1 and (e, f) YP-50F at 5 A g<sup>-1</sup>.

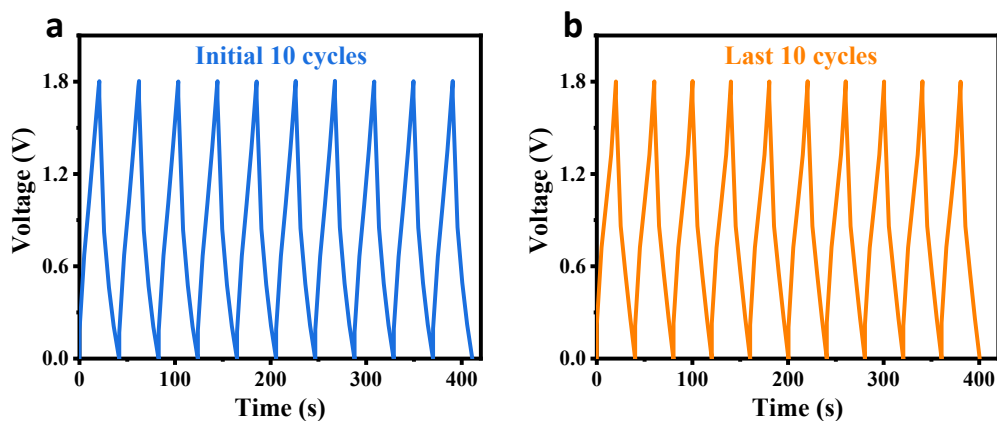

**Fig. S11** Galvanostatic charge-discharge curves for the (a) initial ten cycles and (b) last ten cycles of the HDPC-1 at  $20 \text{ A g}^{-1}$ .

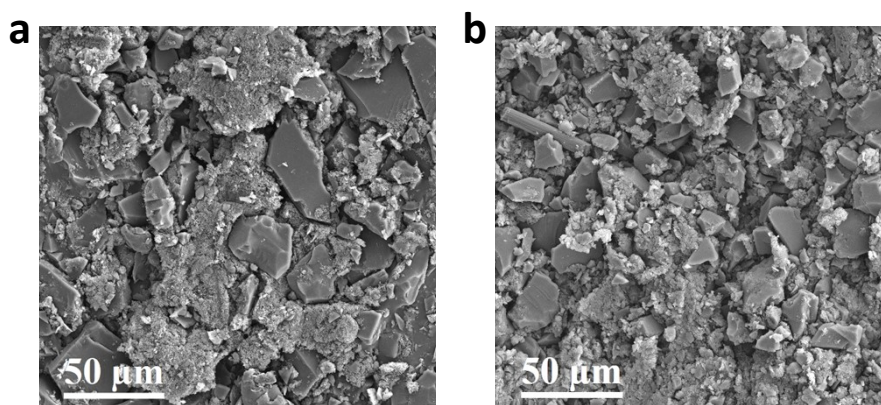

**Fig S12.** SEM images of the HDPC-1 cathodes (a) before cycling and (b) after 300000 cycles at  $20 \text{ A g}^{-1}$ .

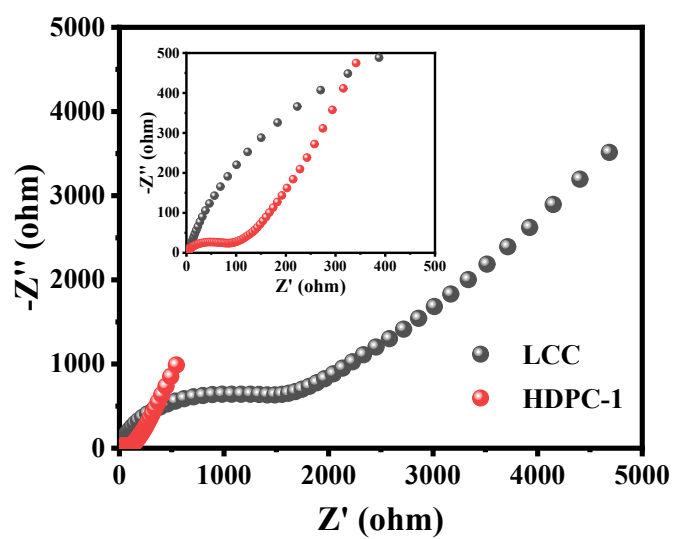

Fig. S13 Nyquist plots of LCC and HDPC-1.

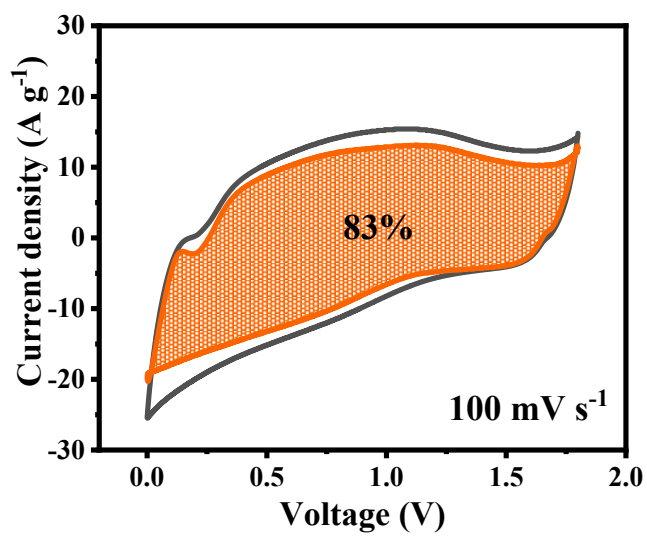

Fig. S14 Capacitive contribution at  $100 \text{ mV s}^{-1}$  of HDPC-1.

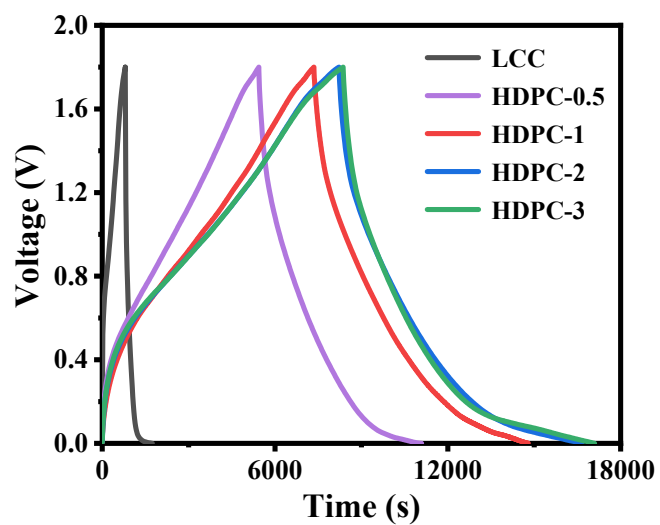

**Fig. S15** Galvanostatic charge-discharge curves of LCC and HDPCs at a current density of  $0.1 \text{ A g}^{-1}$ .

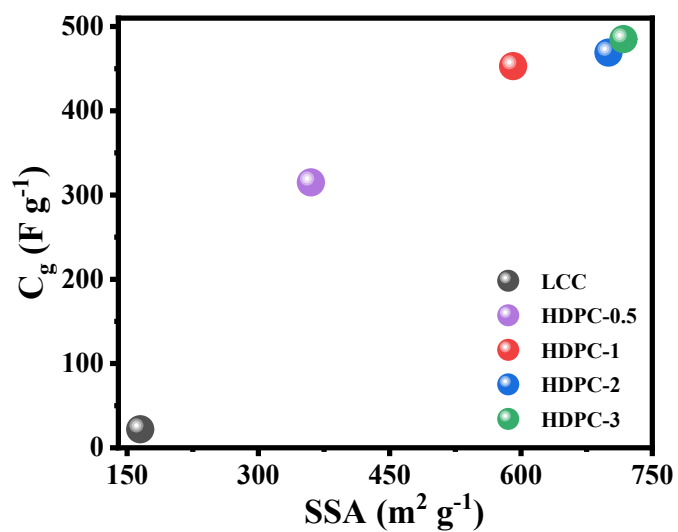

**Fig. S16** Absence of direct correlation between  $C_g$  and SSA in LCC and HDPCs.

## Supplementary Tables

**Table S1** Comparison of  $\rho$  between HDPC-1 and other carbon materials.

| Sample         | $\rho$ (g cm <sup>-3</sup> ) | SSA (m <sup>2</sup> g <sup>-1</sup> ) | Reference        |
|----------------|------------------------------|---------------------------------------|------------------|
| HGF            | 0.71                         | 830                                   | 3                |
| CDC            | 0.53                         | 1202                                  | 4                |
| PF16G-HA       | 0.40                         | 3523                                  | 5                |
| Compressed-25  | 0.75                         | 707                                   | 6                |
| asMEG-O        | 0.59                         | 3290                                  | 7                |
| AQSGH          | 0.05                         | 1050                                  | 8                |
| CXA $\eta$ -30 | 0.66                         | 1133                                  | 9                |
| SP4-3          | 0.49                         | 2335                                  | 10               |
| AC500          | 0.51                         | 2074                                  | 11               |
| RAC-800-2      | 0.55                         | 1911                                  | 12               |
| <b>HDPC-1</b>  | <b>0.78</b>                  | <b>591</b>                            | <b>This work</b> |

**Table S2** Pore structure and  $\rho$  of LCC and HDPCs.

| Sample   | $S_{\text{BET}}$<br>(m <sup>2</sup> g <sup>-1</sup> ) | $S_{\text{micro}}$<br>(m <sup>2</sup> g <sup>-1</sup> ) | $V_{\text{total}}$<br>(cm <sup>3</sup> g <sup>-1</sup> ) | $V_{\text{micro}}$<br>(cm <sup>3</sup> g <sup>-1</sup> ) | $\rho$<br>(g cm <sup>-3</sup> ) |
|----------|-------------------------------------------------------|---------------------------------------------------------|----------------------------------------------------------|----------------------------------------------------------|---------------------------------|
| LCC      | 165                                                   | 165                                                     | 0.06                                                     | 0.05                                                     | 0.22                            |
| HDPC-0.5 | 360                                                   | 264                                                     | 0.32                                                     | 0.09                                                     | 0.92                            |
| HDPC-1   | 591                                                   | 393                                                     | 0.61                                                     | 0.14                                                     | 0.78                            |
| HDPC-2   | 700                                                   | 384                                                     | 1.30                                                     | 0.06                                                     | 0.32                            |
| HDPC-3   | 717                                                   | 388                                                     | 1.41                                                     | 0.03                                                     | 0.15                            |

**Table S3** Comparison of  $C_g$  between HDPC-1 with reported carbon-based materials for ZHSCs under various areal mass loadings.

| Sample                | Mass loading<br>( $\text{mg cm}^{-2}$ ) | Current density<br>( $\text{A g}^{-1}$ ) | $C_g$<br>( $\text{F g}^{-1}/\text{mAh g}^{-1}$ ) | Reference |
|-----------------------|-----------------------------------------|------------------------------------------|--------------------------------------------------|-----------|
| PSC-A600              | 2                                       | 0.2                                      | 413.3 $\text{F g}^{-1}$                          | 13        |
| N,P-OLC               | 0.5                                     | 0.5                                      | 420.3 $\text{F g}^{-1}$                          | 14        |
| Zn-3-MnO <sub>2</sub> | 2-3                                     | 0.2                                      | 282.9 $\text{F g}^{-1}$                          | 15        |
| 75%NHG-rGO            | 0.66                                    | 0.1                                      | 198 $\text{F g}^{-1}$                            | 16        |
| NMCSs                 | 1-1.2                                   | 0.2                                      | 355 $\text{F g}^{-1}$                            | 17        |
| 3D-PG-1               | 1                                       | 0.1                                      | 217 $\text{F g}^{-1}$                            | 18        |
| DFs                   | 1.6                                     | 0.2                                      | 35.1 $\text{F g}^{-1}$                           | 19        |
| HOGS                  | 2                                       | 0.1                                      | 175 $\text{F g}^{-1}$                            | 20        |
| HOGS                  | 10                                      | 0.1                                      | 200 $\text{F g}^{-1}$                            | 20        |
| N-HPLC-700            | 3                                       | 0.2                                      | 354 $\text{F g}^{-1}$                            | 21        |
| FCNSs                 | 2                                       | 0.2                                      | 198 $\text{F g}^{-1}$                            | 22        |
| S-3DPC-800            | 5                                       | 0.5                                      | 168.2 $\text{mAh g}^{-1}$                        | 23        |
| ANHPC-2               | 1                                       | 0.5                                      | 197.2 $\text{mAh g}^{-1}$                        | 24        |
| ANHPC-2               | 10                                      | 0.5                                      | 103.4 $\text{mAh g}^{-1}$                        | 24        |
| PCNF-4                | 1.2                                     | 0.5                                      | 177 $\text{mAh g}^{-1}$                          | 25        |
| BN-C                  | 1                                       | 0.1                                      | 190.2 $\text{mAh g}^{-1}$                        | 26        |
| HPC-CC                | 1.5-2                                   | 0.5                                      | 138.5 $\text{mAh g}^{-1}$                        | 27        |
| PPy/N-rGO             | 1-1.2                                   | 0.1                                      | 145.3 $\text{mAh g}^{-1}$                        | 28        |
| R6                    | 1                                       | 0.5                                      | 168.4 $\text{mAh g}^{-1}$                        | 29        |
| PHCA                  | 2                                       | 1                                        | 143.7 $\text{mAh g}^{-1}$                        | 30        |
| AC                    | 0.7-0.8                                 | 0.1                                      | 121 $\text{mAh g}^{-1}$                          | 31        |
| NPC                   | 1.5                                     | 0.2                                      | 136.2 $\text{mAh g}^{-1}$                        | 32        |
| N/P/O-PC-1200         | 5                                       | 0.2                                      | 125.3 $\text{mAh g}^{-1}$                        | 33        |

| Sample        | Mass loading<br>(mg cm <sup>-2</sup> ) | Current density<br>(A g <sup>-1</sup> ) | C <sub>g</sub><br>(F g <sup>-1</sup> /mAh g <sup>-1</sup> ) | Reference        |
|---------------|----------------------------------------|-----------------------------------------|-------------------------------------------------------------|------------------|
| ZnHPC-0.5     | 2                                      | 0.5                                     | 120.3 mAh g <sup>-1</sup>                                   | 34               |
| PANI          | 1.5                                    | 0.05                                    | 200 mAh g <sup>-1</sup>                                     | 35               |
| <b>HDPC-1</b> | <b>1.3</b>                             | <b>0.1</b>                              | <b>452 F g<sup>-1</sup>/227 mAh g<sup>-1</sup></b>          | <b>This work</b> |
| <b>HDPC-1</b> | <b>12.5</b>                            | <b>0.1</b>                              | <b>280 F g<sup>-1</sup>/140 mAh g<sup>-1</sup></b>          | <b>This work</b> |



**Table S4** Comparison of  $E_g$  and  $P_g$  between HDPC-1 and other carbon-based materials for ZHSCs.

| Sample        | $P_g$ (W kg <sup>-1</sup> ) | $E_g$ (Wh kg <sup>-1</sup> ) | Reference        |
|---------------|-----------------------------|------------------------------|------------------|
| NS-OPC        | 6063                        | 53                           | 36               |
| RNP-1-2-Air   | 4000                        | 54                           | 37               |
| NPG-0.75      | 4500                        | 94                           | 38               |
| 75%NHG-rGO    | 3750                        | 57                           | 16               |
| NMCSs         | 160                         | 126                          | 17               |
| OPC           | 3760                        | 38                           | 39               |
| MXene-rGO2    | 279                         | 34                           | 40               |
| Kelp-carbon   | 1300                        | 111                          | 41               |
| C2NN1-800-1-5 | 180                         | 133                          | 42               |
| HOPC          | 4000                        | 71                           | 43               |
| FCNSs         | 39333                       | 41                           | 22               |
| S-3DPC-800    | 160                         | 162                          | 23               |
| DGH           | 400                         | 78                           | 44               |
| N-CNF         | 367                         | 143                          | 45               |
| 3D-PG-1       | 85                          | 86                           | 27               |
| YP-50F        | 90                          | 42                           | This work        |
| <b>HDPC-1</b> | <b>45000</b>                | <b>68</b>                    | <b>This work</b> |

**Table S5** Comparison of  $E_v$  and  $P_v$  between HDPC-1 and other carbon-based materials for ZHSCs.

| Sample        | $P_v$ (W L <sup>-1</sup> ) | $E_v$ (Wh L <sup>-1</sup> ) | Reference        |
|---------------|----------------------------|-----------------------------|------------------|
| NP-CNC        | 9100                       | 82                          | 1                |
| 75%NHG-rGO    | 3750                       | 58                          | 16               |
| NMCSs         | 40                         | 32                          | 17               |
| FCNSs         | 17700                      | 19                          | 22               |
| S-3DPC-800    | 97                         | 99                          | 23               |
| DGH           | 600                        | 118                         | 44               |
| 3D-PG-1       | 116                        | 118                         | 27               |
| YP-50F        | 36                         | 17                          | This work        |
| <b>HDPC-1</b> | <b>35100</b>               | <b>53</b>                   | <b>This work</b> |

**Table S6** Electrochemical impedance spectroscopy parameters of LCC and HDPC-1 cathodes.

| Sample | Ohmic resistance $R_s$ ( $\Omega$ ) | Charge transfer resistance $R_{ct}$ ( $\Omega$ ) |
|--------|-------------------------------------|--------------------------------------------------|
| LCC    | 2.3                                 | 1864.0                                           |
| HDPC-1 | 1.3                                 | 81.1                                             |

**Table S7**  $C_g$  of LCC and HDPCs at various current densities.

| Sample   | 0.1 A g <sup>-1</sup><br>(F g <sup>-1</sup> ) | 0.2 A g <sup>-1</sup><br>(F g <sup>-1</sup> ) | 0.5 A g <sup>-1</sup><br>(F g <sup>-1</sup> ) | 1 A g <sup>-1</sup><br>(F g <sup>-1</sup> ) | 2 A g <sup>-1</sup><br>(F g <sup>-1</sup> ) | 5 A g <sup>-1</sup><br>(F g <sup>-1</sup> ) | 10 A g <sup>-1</sup><br>(F g <sup>-1</sup> ) | 20 A g <sup>-1</sup><br>(F g <sup>-1</sup> ) | 50 A g <sup>-1</sup><br>(F g <sup>-1</sup> ) |
|----------|-----------------------------------------------|-----------------------------------------------|-----------------------------------------------|---------------------------------------------|---------------------------------------------|---------------------------------------------|----------------------------------------------|----------------------------------------------|----------------------------------------------|
| LCC      | 22                                            | 14                                            | 8                                             | 6                                           | 5                                           | 4.5                                         | 4.4                                          | 4.2                                          | 4.1                                          |
| HDPC-0.5 | 315                                           | 220                                           | 166                                           | 136                                         | 115                                         | 95                                          | 82                                           | 73                                           | 57                                           |
| HDPC-1   | 453                                           | 382                                           | 332                                           | 309                                         | 281                                         | 255                                         | 235                                          | 212                                          | 151                                          |
| HDPC-2   | 469                                           | 410                                           | 362                                           | 349                                         | 322                                         | 282                                         | 252                                          | 225                                          | 176                                          |
| HDPC-3   | 485                                           | 422                                           | 376                                           | 361                                         | 340                                         | 306                                         | 276                                          | 240                                          | 192                                          |

**Table S8** C, N, and H content from elemental analysis of LCC and HDPCs.

| Sample   | C (wt.%) | N (wt.%) | H (wt.%) |
|----------|----------|----------|----------|
| LCC      | 73.52    | 12.81    | 2.36     |
| HDPC-0.5 | 73.25    | 13.94    | 1.92     |
| HDPC-1   | 74.04    | 13.05    | 2.03     |
| HDPC-2   | 73.28    | 13.63    | 2.12     |
| HDPC-3   | 72.56    | 13.51    | 2.19     |

**Table S9**  $C_s$  of different pore size subsections of LCC and HDPCs for the identification of the lower threshold value.

| Sample   | $C_{s,>0.55 \text{ nm}}$<br>( $F \text{ m}^{-2}$ ) | $C_{s,>0.6 \text{ nm}}$<br>( $F \text{ m}^{-2}$ ) | $C_{s,>0.7 \text{ nm}}$<br>( $F \text{ m}^{-2}$ ) | $C_{s,>0.8 \text{ nm}}$<br>( $F \text{ m}^{-2}$ ) | $C_{s,>0.9 \text{ nm}}$<br>( $F \text{ m}^{-2}$ ) | $C_{s,>1.0 \text{ nm}}$<br>( $F \text{ m}^{-2}$ ) | $C_{s,>1.1 \text{ nm}}$<br>( $F \text{ m}^{-2}$ ) | $C_{s,>1.2 \text{ nm}}$<br>( $F \text{ m}^{-2}$ ) | $C_{s,>1.3 \text{ nm}}$<br>( $F \text{ m}^{-2}$ ) |
|----------|----------------------------------------------------|---------------------------------------------------|---------------------------------------------------|---------------------------------------------------|---------------------------------------------------|---------------------------------------------------|---------------------------------------------------|---------------------------------------------------|---------------------------------------------------|
| LCC      | 0.26                                               | 0.26                                              | 0.35                                              | 0.48                                              | 0.48                                              | 0.54                                              | 1.10                                              | 3.67                                              | 4.40                                              |
| HDPC-0.5 | 1.29                                               | 1.45                                              | 1.93                                              | 2.42                                              | 2.58                                              | 2.60                                              | 2.69                                              | 2.89                                              | 3.18                                              |
| HDPC-1   | 1.14                                               | 1.24                                              | 1.54                                              | 1.89                                              | 2.15                                              | 2.22                                              | 2.28                                              | 2.34                                              | 2.42                                              |
| HDPC-2   | 1.16                                               | 1.28                                              | 1.58                                              | 1.75                                              | 1.76                                              | 1.76                                              | 1.76                                              | 1.84                                              | 1.91                                              |
| HDPC-3   | 1.25                                               | 1.37                                              | 1.61                                              | 1.72                                              | 1.72                                              | 1.72                                              | 1.72                                              | 1.80                                              | 1.82                                              |

Note:  $C_{s,>0.55 \text{ nm}}$ ,  $C_{s,>0.6 \text{ nm}}$ ,  $C_{s,>0.7 \text{ nm}}$ ,  $C_{s,>0.8 \text{ nm}}$ ,  $C_{s,>0.9 \text{ nm}}$ ,  $C_{s,>1.0 \text{ nm}}$ ,  $C_{s,>1.1 \text{ nm}}$ ,  $C_{s,>1.2 \text{ nm}}$ , and  $C_{s,>1.3 \text{ nm}}$  represent  $C_s$  of pores with diameters above 0.55 nm, above 0.6 nm, above 0.7 nm, above 0.8 nm, above 0.9 nm, above 1.0 nm, above 1.1 nm, above 1.2 nm, and above 1.3 nm, respectively.

**Table S10** RSD of  $C_s$  for different pore size subsections to determine the lower threshold value.

| $C_s$ | $C_{s,>0.55 \text{ nm}}$ | $C_{s,>0.6 \text{ nm}}$ | $C_{s,>0.7 \text{ nm}}$ | $C_{s,>0.8 \text{ nm}}$ | $C_{s,>0.9 \text{ nm}}$ | $C_{s,>1.0 \text{ nm}}$ | $C_{s,>1.1 \text{ nm}}$ | $C_{s,>1.2 \text{ nm}}$ | $C_{s,>1.3 \text{ nm}}$ |
|-------|--------------------------|-------------------------|-------------------------|-------------------------|-------------------------|-------------------------|-------------------------|-------------------------|-------------------------|
| RSD   | 0.4203                   | 0.4345                  | 0.4322                  | 0.4326                  | 0.4522                  | 0.4402                  | 0.3162                  | 0.3137                  | 0.3906                  |

**Table S11**  $C_s$  of different pore size subsections of LCC and HDPCs for the identification of the upper threshold value.

| Sample   | $C_{s,1.2-2 \text{ nm}}$<br>(F m <sup>-2</sup> ) | $C_{s,1.2-3 \text{ nm}}$<br>(F m <sup>-2</sup> ) | $C_{s,1.2-4 \text{ nm}}$<br>(F m <sup>-2</sup> ) | $C_{s,1.2-5 \text{ nm}}$<br>(F m <sup>-2</sup> ) | $C_{s,1.2-5.5 \text{ nm}}$<br>(F m <sup>-2</sup> ) | $C_{s,1.2-6 \text{ nm}}$<br>(F m <sup>-2</sup> ) | $C_{s,1.2-7 \text{ nm}}$<br>(F m <sup>-2</sup> ) | $C_{s,1.2-8 \text{ nm}}$<br>(F m <sup>-2</sup> ) |
|----------|--------------------------------------------------|--------------------------------------------------|--------------------------------------------------|--------------------------------------------------|----------------------------------------------------|--------------------------------------------------|--------------------------------------------------|--------------------------------------------------|
| LCC      | 3.67                                             | 3.67                                             | 3.67                                             | 3.67                                             | 3.67                                               | 3.67                                             | 3.67                                             | 3.67                                             |
| HDPC-0.5 | 10.16                                            | 8.75                                             | 7.16                                             | 5.00                                             | 3.66                                               | 3.25                                             | 2.89                                             | 2.86                                             |
| HDPC-1   | 13.32                                            | 10.53                                            | 8.24                                             | 5.27                                             | 3.46                                               | 2.92                                             | 2.46                                             | 2.40                                             |
| HDPC-2   | 13.03                                            | 12.68                                            | 10.20                                            | 6.09                                             | 3.97                                               | 3.37                                             | 2.88                                             | 2.71                                             |
| HDPC-3   | 10.32                                            | 9.70                                             | 7.82                                             | 5.51                                             | 4.08                                               | 3.59                                             | 3.01                                             | 2.77                                             |

Note:  $C_{s,1.2-2 \text{ nm}}$ ,  $C_{s,1.2-3 \text{ nm}}$ ,  $C_{s,1.2-4 \text{ nm}}$ ,  $C_{s,1.2-5 \text{ nm}}$ ,  $C_{s,1.2-5.5 \text{ nm}}$ ,  $C_{s,1.2-6 \text{ nm}}$ ,  $C_{s,1.2-7 \text{ nm}}$ , and  $C_{s,1.2-8 \text{ nm}}$  represent  $C_s$  of pores with diameters from 1.2 nm to 2 nm, from 1.2 nm to 3 nm, from 1.2 nm to 4 nm, from 1.2 nm to 5 nm, from 1.2 nm to 5.5 nm, from 1.2 nm to 6 nm, from 1.2 nm to 7 nm, and from 1.2 nm to 8 nm, respectively.

**Table S12** RSD of  $C_s$  for different pore size subsections to determine the upper threshold value.

| $C_s$ | $C_{s,1.2-2}$<br>nm | $C_{s,1.2-3}$<br>nm | $C_{s,1.2-4}$<br>nm | $C_{s,1.2-5}$<br>nm | $C_{s,1.2-5.5}$<br>nm | $C_{s,1.2-6}$<br>nm | $C_{s,1.2-7}$<br>nm | $C_{s,1.2-8}$<br>nm |
|-------|---------------------|---------------------|---------------------|---------------------|-----------------------|---------------------|---------------------|---------------------|
| RSD   | 0.3848              | 0.3693              | 0.3211              | 0.1763              | 0.0669                | 0.0883              | 0.1461              | 0.1639              |

**Table S13** Capacitance retention (CR) for LCC and HDPCs across current densities from 0.1 A g<sup>-1</sup> to various values.

| Sample   | CR <sub>0.1-0.2</sub><br>(%) | CR <sub>0.1-0.5</sub><br>(%) | CR <sub>0.1-1</sub><br>(%) | CR <sub>0.1-2</sub><br>(%) | CR <sub>0.1-5</sub><br>(%) | CR <sub>0.1-10</sub><br>(%) | CR <sub>0.1-20</sub><br>(%) | CR <sub>0.1-50</sub><br>(%) |
|----------|------------------------------|------------------------------|----------------------------|----------------------------|----------------------------|-----------------------------|-----------------------------|-----------------------------|
| LCC      | 64                           | 36                           | 27                         | 23                         | 21                         | 20                          | 19                          | 18                          |
| HDPC-0.5 | 70                           | 53                           | 43                         | 37                         | 30                         | 26                          | 23                          | 18                          |
| HDPC-1   | 84                           | 73                           | 68                         | 62                         | 56                         | 52                          | 46                          | 33                          |
| HDPC-2   | 87                           | 77                           | 74                         | 69                         | 60                         | 54                          | 48                          | 38                          |
| HDPC-3   | 87                           | 78                           | 75                         | 70                         | 63                         | 57                          | 50                          | 40                          |

Note: CR<sub>0.1-0.2</sub>, CR<sub>0.1-0.5</sub>, CR<sub>0.1-1</sub>, CR<sub>0.1-2</sub>, CR<sub>0.1-5</sub>, CR<sub>0.1-10</sub>, CR<sub>0.1-20</sub>, and CR<sub>0.1-50</sub> represent CR from 0.1 A g<sup>-1</sup> to 0.2 A g<sup>-1</sup>, from 0.1 A g<sup>-1</sup> to 0.5 A g<sup>-1</sup>, from 0.1 A g<sup>-1</sup> to 1 A g<sup>-1</sup>, from 0.1 A g<sup>-1</sup> to 2 A g<sup>-1</sup>, from 0.1 A g<sup>-1</sup> to 5 A g<sup>-1</sup>, from 0.1 A g<sup>-1</sup> to 10 A g<sup>-1</sup>, from 0.1 A g<sup>-1</sup> to 20 A g<sup>-1</sup>, and from 0.1 A g<sup>-1</sup> to 50 A g<sup>-1</sup>, respectively.

## Supplementary References

- 1 L. Yang, X. He, Y. Wei, H. Bi, F. Wei, H. Li, C. Yuan and J. Qiu, *Nano Research*, 2022, **15**, 4068.
- 2 J. Wang, X. Yang, D. Wu, R. Fu, M. Dresselhaus and G. Dresselhaus, *Journal of Power Sources*, 2008, **185**, 589.
- 3 Y. Xu, Z. Lin, X. Zhong, X. Huang, N. Weiss, Y. Huang and X. Duan, *Nature Communications*, 2014, **5**, 4554.
- 4 C. Largeot, C. Portet, J. Chmiola, P. Taberna, Y. Gogotsi and P. Simon, *Journal of the American Chemical Society*, 2008, **130**, 2730.
- 5 L. Zhang, F. Zhang, X. Yang, G. Long, Y. Wu, T. Zhang, K. Leng, Y. Huang, Y. Ma, A. Yu and Y. Chen, *Scientific Reports*, 2013, **3**, 1408.
- 6 S. Murali, N. Quarles, L. Zhang, J. Potts, Z. Tan, Y. Lu, Y. Zhu and R. Ruoff, *Nano Energy*, 2013, **2**, 764.
- 7 T. Kim, G. Jung, S. Yoo, K. Suh and R. Ruoff, *ACS Nano*, 2013, **7**, 6899.
- 8 Q. Wu, Y. Sun, H. Bai and G. Shi, *Physical Chemistry Chemical Physics*, 2011, **13**, 11193.
- 9 Z. Zapata-Benabithé, F. Carrasco-Marín, J. Vicente and C. Moreno-Castilla, *Langmuir*, 2013, **29**, 6166.
- 10 A. Alonso, V. Ruiz, C. Blanco, R. Santamaría, M. Granda, R. Menéndez and S. Jager, *Carbon*, 2006, **44**, 441.
- 11 B. Xu, Y. Chen, G. Wei, G. Cao, H. Zhang and Y. Yang, *Materials Chemistry and Physics*, 2010, **124**, 504.
- 12 C. Zhao, Y. Huang, C. Zhao, X. Shao and Z. Zhu, *Electrochimica Acta*, 2018, **291**, 287.
- 13 Z. Li, D. Chen, Y. An, C. Chen, L. Wu, Z. Chen, Y. Sun and X. Zhang, *Energy Storage Materials*, 2020, **28**, 307.
- 14 H. Wang, Q. Chen, P. Xiao and L. Cao, *ACS Applied Materials & Interfaces*, 2022, **14**, 9013.
- 15 S. He, Z. Mo, C. Shuai, W. Liu, R. Yue, G. Liu, H. Pei, Y. Chen, N. Liu and R. Guo,

- Applied Surface Science*, 2022, **577**, 151904.
- 16 J. Luo, L. Xu, H. Liu, Y. Wang, Q. Wang, Y. Shao, M. Wang, D. Yang, S. Li, L. Zhang, Z. Xia, T. Cheng and Y. Shao, *Advanced Functional Materials*, 2022, **32**, 2112151.
  - 17 Z. Peng, J. Guo, Q. He, S. Li, L. Tan and Y. Chen, *Sci. China Mater.*, 2022, **65**, 2401.
  - 18 X. Xu, X. Zhao, Z. Yang, Q. Lin, B. Jian, N. Li, C. Zheng and W. Lv, *Carbon*, 2022, **186**, 624.
  - 19 Z. Jian, N. Yang, M. Vogel, S. Leith, A. Schulte, H. Schönherr, T. Jiao, W. Zhang, J. Müller, B. Butz and X. Jiang, *Advanced Energy Materials*, 2020, **10**, 2002202.
  - 20 H. Ma, H. Geng, B. Yao, M. Wu, C. Li, M. Zhang, F. Chi and L. Qu, *ACS Nano*, 2019, **13**, 9161.
  - 21 F. Fu, D. Yang, Y. Fan, X. Qiu, J. Huang, Z. Li and W. Zhang, *Journal of Colloid and Interface Science*, 2022, **628**, 90.
  - 22 H. Zhou, C. Liu, J. Wu, M. Liu, D. Zhang, H. Song, X. Zhang, H. Gao, J. Yang and D. Chen, *Journal of Materials Chemistry A*, 2019, **7**, 9708.
  - 23 D. Wang, S. Wang and Z. Lu, *International Journal of Energy Research*, 2021, **45**, 2498.
  - 24 L. Wang, M. Peng, J. Chen, T. Hu, K. Yuan and Y. Chen, *Advanced Materials*, 2022, **34**, 2203744.
  - 25 Z. Pan, Z. Lu, L. Xu and D. Wang, *Applied Surface Science*, 2020, **510**, 145384.
  - 26 C. Zhu, H. Wang, W. Fan, S. Zhai, X. Wang, J. Shi, M. Huang, S. Liu, Z. Li and J. Chen, *Rare Metals*, 2022, **41**, 2505.
  - 27 X. Deng, J. Li, Z. Shan, J. Sha, L. Ma and N. Zhao, *Journal of Materials Chemistry A*, 2020, **8**, 11617.
  - 28 P. Pattananuwat, R. Pornprasertsuk, J. Qin and S. Prasertkaew, *RSC Advances*, 2021, **11**, 35205.
  - 29 L. Huang, Y. Xiang, M. Luo, Q. Zhang, H. Zhu, K. Shi and S. Zhu, *Carbon*, 2021, **185**, 1.
  - 30 H. Fan, S. Zhou, Q. Chen, G. Gao, Q. Ban, Z. Xu, F. He, G. Hu and X. Hu, *Journal of Power Sources*, 2021, **493**, 229687.
  - 31 L. Dong, X. Ma, Y. Li, L. Zhao, W. Liu, J. Cheng, C. Xu, B. Li, Q. Yang and F. Kang,



- Energy Storage Materials*, 2018, **13**, 96.
- 32 X. Shi, H. Zhang, S. Zeng, J. Wang, X. Cao, X. Liu and X. Lu, *ACS Materials Letters*, 2021, **3**, 1291.
- 33 M. Liu, F. Wu, X. Feng, Y. Wang, L. Zheng, X. Li, Y. Li, Y. Gong, Y. Bai and C. Wu, *Science China Materials*, 2023, **66**, 541.
- 34 S. Yang, Y. Cui, G. Yang, S. Zhao, J. Wang, D. Zhao, C. Yang, X. Wang and B. Cao, *Journal of Power Sources*, 2023, **554**, 232347.
- 35 F. Wan, L. Zhang, X. Wang, S. Bi, Z. Niu and J. Chen, *Advanced Functional Materials*, 2018, **28**, 1804975.
- 36 J. Yu, X. Jia, J. Peng, B. Meng, Y. Wei, X. Hou, J. Zhao, N. Yang, K. Xie, D. Chu and L. Li, *ACS Applied Energy Materials*, 2023, **6**, 2728.
- 37 K. Wang, Y. Chen, Y. Liu, H. Zhang, Y. Shen, Z. Pu, H. Qiu and Y. Li, *Journal of Alloys and Compounds*, 2022, **901**, 163588.
- 38 Y. Zhao, H. Hao, T. Song, X. Wang, C. Li and W. Li, *Journal of Power Sources*, 2022, **521**, 230941.
- 39 Y. Zheng, W. Zhao, D. Jia, Y. Liu, L. Cui, D. Wei, R. Zheng and J. Liu, *Chemical Engineering Journal*, 2020, **387**, 124161.
- 40 Q. Wang, S. Wang, X. Guo, L. Ruan, N. Wei, Y. Ma, J. Li, M. Wang, W. Li and W. Zeng, *Advanced Electronic Materials*, 2019, **5**, 1900537.
- 41 J. Zeng, L. Dong, L. Sun, W. Wang, Y. Zhou, L. Wei and X. Guo, *Nano-Micro Letters*, 2020, **13**, 19.
- 42 H. Yu, X. Chen, J. Zhou and H. Wang, *Journal of Materials Science-Materials in Electronics*, 2023, **34**, 675.
- 43 H. Ma, H. Chen, M. Wu, F. Chi, F. Liu, J. Bai, H. Cheng, C. Li and L. Qu, *Angewandte Chemie-International Edition*, 2020, **132**, 14649.
- 44 L. Zhang, D. Wu, G. Wang, Y. Xu, H. Li and X. Yan, *Chinese Chemical Letters*, 2021, **32**, 926.
- 45 A. Amiri, M. Naraghi and A. Polycarpou, *Journal of Energy Chemistry*, 2022, **70**, 480.
